# Supplementary material for: Interfacial Dipole poly(2-ethyl-2-oxazoline) Modification Triggers Simultaneous Band Alignment and Passivation for Air-Stable Perovskite Solar Cells
Source: Polymers (Basel). 2022 Jul 5;14(13):2748. doi: 10.3390/polym14132748 (PMC9269119; doi:10.3390/polym14132748)
Supplement: Supplementary file 1 [file polymers-14-02748-s001.zip › polymers-1792786-supplementary.pdf]

## Supporting Information

# Interfacial Dipole Poly(2-ethyl-2-oxazoline) Modification Triggers Simultaneous Band Alignment and Passivation for Air-Stable Perovskite Solar Cells

He Xi <sup>1,\*</sup>, Zhicheng Song <sup>2</sup>, Yonggang Guo <sup>3</sup>, Weijia Zhu <sup>1</sup>, Lisong Ding <sup>1</sup>, Weidong Zhu <sup>2</sup>, Dazheng Chen <sup>2</sup> and Chunfu Zhang <sup>2,\*</sup>

<sup>1</sup> School of Advanced Materials and Nanotechnology, Xidian University, Xi'an 710126, China; 18329743263@163.com (W.Z.); d1446124526@126.com (L.D.)

<sup>2</sup> State Key Discipline Laboratory of Wide Band Gap Semiconductor, School of Microelectronics, Xidian University, Xi'an 710071, China; songzhicheng@spic.com.cn (Z.S.); wdzhu@xidian.edu.cn (W.Z.); dzchen@xidian.edu.cn (D.C.)

<sup>3</sup> Qinghai Huanghe Hydropower Development Co., Ltd., Xi'an Solar Power Branch, Xi'an 710000, China; guoyonggang@spic.com.cn

\* Correspondence: hxi@xidian.edu.cn (H.X.); cfzhang@xidian.edu.cn (C.Z.)

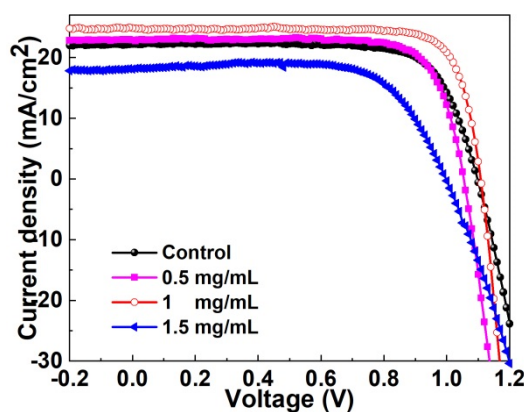

**Figure S1.**  $J$ - $V$  characteristics of best-performing control device and devices fabricated with different concentrations of PEOz under AM 1.5G illumination ( $100 \text{ mW cm}^{-2}$ ).

**Table S1.** Photovoltaic parameters of best-performing control device and device prepared with different concentrations of PEOz.

|           | $J_{sc}$ (mA/cm <sup>2</sup> ) | $V_{oc}$ (V) | FF (%) | PCE (%) |
|-----------|--------------------------------|--------------|--------|---------|
| Control   | 22.22                          | 1.09         | 74.56  | 18.14   |
| 0.5 mg/mL | 22.90                          | 1.05         | 77.35  | 18.66   |
| 1 mg/mL   | 24.88                          | 1.11         | 79.32  | 21.86   |
| 1.5 mg/mL | 18.13                          | 1.00         | 71.46  | 12.93   |

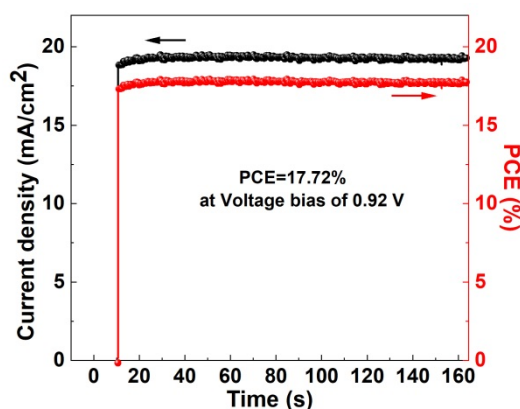

**Figure S2.** Steady-state photocurrent and PCE output characteristics of the control device.

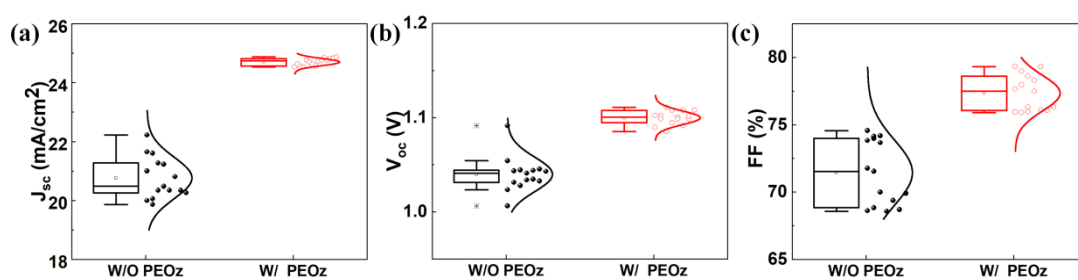

**Figure S3.** Statistical results of (a)  $J_{sc}$ , (b)  $V_{oc}$  and (c) FF for the device without and with PEOz, respectively.

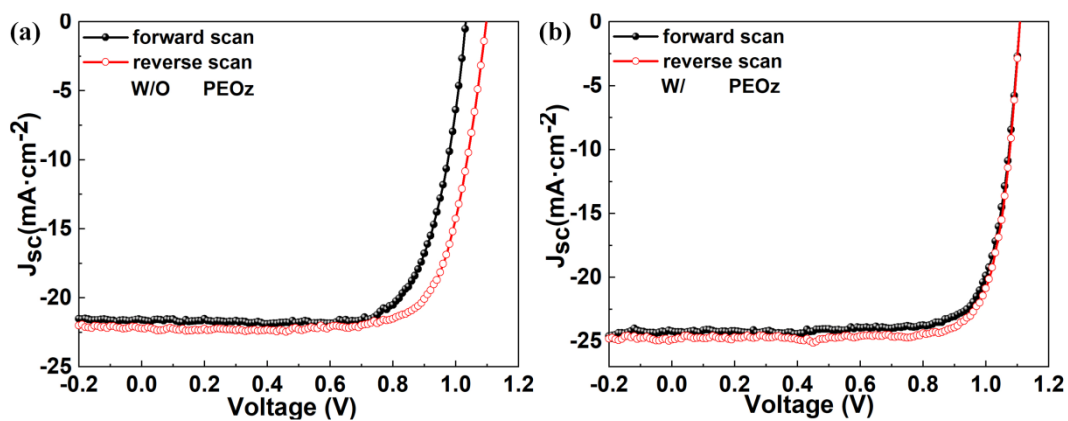

**Figure S4.**  $J$ - $V$  curves with different scanning directions of the PSCs (a) without and (b) with PEOz layer, respectively.

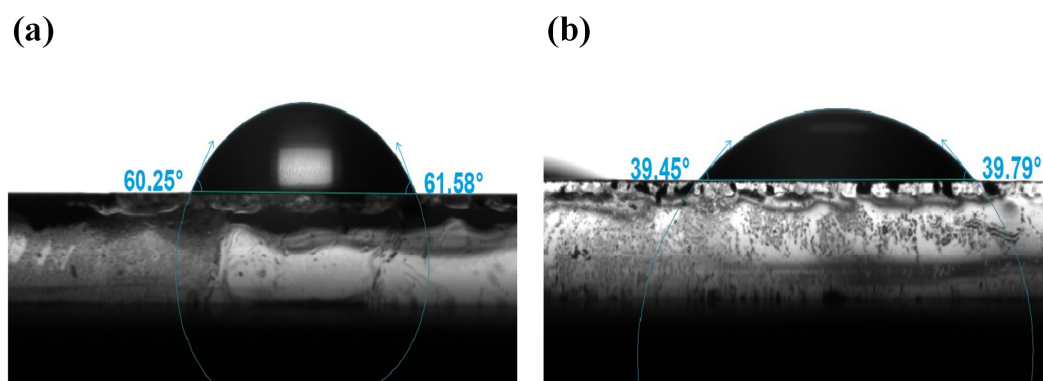

**Figure S5.** Water contact angles of the  $\text{MA}_{0.7}\text{FA}_{0.3}\text{PbI}_{3-x}\text{Cl}_x$  films (a) without and (b) with PEOz deposition, respectively.
